# Supplementary material
Source: Springer Nature journal article supplement (https://www.springermedizin.de/resource/supplementary/13013_2010_404_MOESM2_ESM.pdf/9631640)

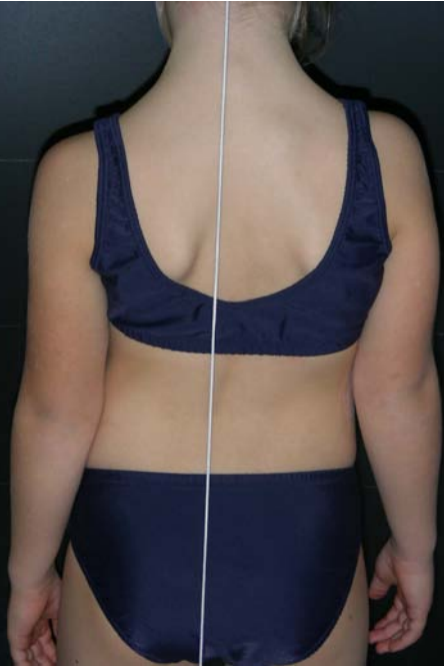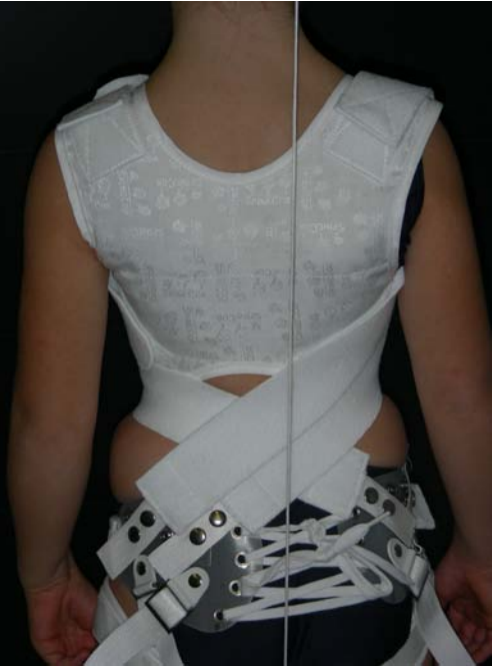

Supplement: MOESM2 [file 9631640]
